# Supplementary material
Source: PubMed Central journal article supplement (PMC7145745)

Supplementary Figure 1

|               | <b>Forward</b>          | <b>Reverse</b>          |
|---------------|-------------------------|-------------------------|
| hTNF $\alpha$ | CAGGTTCTCTTCCTCTCACATAC | CTCCCGGATCATGCTTTCA     |
| mTNF $\alpha$ | CTACCTTGTTGCCTCCTCTTT   | GAGCAGAGGTTTCAGTGATGTAG |
| CCL2          | ACAGATGAGCTGTGGGCATC    | TTGGAGGCAGTAGTTGTGCGTA  |
| Col2          | CATCGAGTACCGATCACAGAAG  | GCCCTATGTCCACACCAAAT    |
| MMP3          | ACATGGAGACTTTGTCCCTTTTG | TTGGCTGAGTGGTAGAGTCCC   |
| Klf6          | GGAGAAGAAGGAGGAATCAGAAC | CAGAGTTCAGGCTATTGGTCTC  |
| Adrb2         | GCCATCCTCATGTGCGTTAT    | AGTAGTTGGTGACGGTTTGTAG  |
| Lyz2          | GCTCAGCACGAGAGCAATTA    | TGCCATCATTACACCAGTATCG  |
| Nfkbia        | GGCCAGCGTCTGACATTAT     | GTGTGGTGTGGTGCTAAGTAT   |
| Lilrb4a       | GGAACAGAACAACAGCTGAAAC  | GAGTCCACTGGGATCAAATACC  |
| Cd74          | GCCTCAGCCCTTCTTATGTT    | GTCCTCCTTCTGTTCTGACTTC  |
| Klf2          | GGCTAGATGCCTTGTGAGAAA   | TGCCATCGTCTCCCTTATAGA   |
| Ctss          | GACGCTTCCTATCCCTACAAAG  | CCAAACGGGAGCTGAATGTA    |
| Rhob          | TGTGTGTGTACGACTCCCTA    | GTAGTGGCTTGCTGGTTACA    |
| Acp5          | GCAGTATCTTCAGGACGAGAAC  | TCCATAGTGAAACCGCAAGTAG  |
| Ovgp1         | GGAAGGCGTTTGGATTTTCATT  | GAAGGGAGAACAGAGGACTATTG |
| Slc22a17      | TTGCAGGAACTGGAGAATACC   | GTTGGTGAAGCCCAGGATAA    |
| Tm4sf1        | GGAATCGTGGGATCTGCTTAC   | GGCAAAGGTGTAGTTCCATACT  |
| Krtdap        | GATCCCAGTGACCATTCTCTT   | GTCGTAGGATGGACTTCAGATTC |
| Gapdh         | TCTCCCTCACAATTTCCATCC   | GGGTGCAGCGAACTTTATTG    |

A

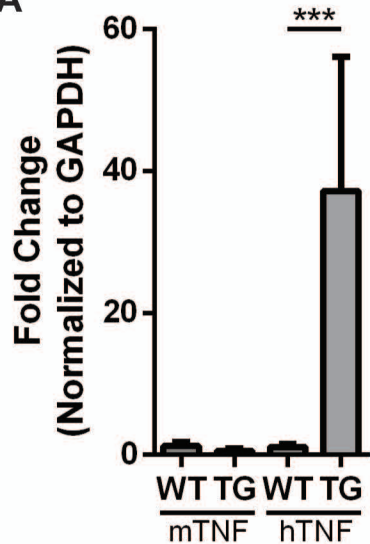

B

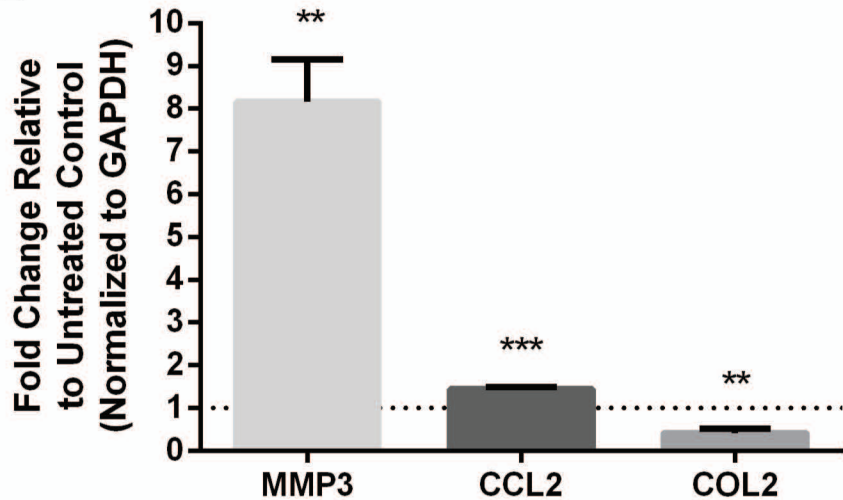

## Aggrecan

WT

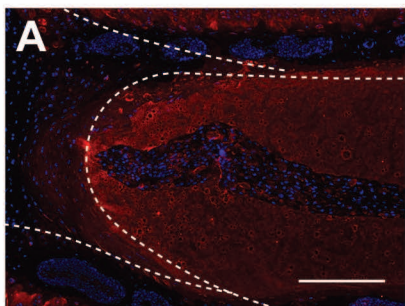hTNF $\alpha$ -TG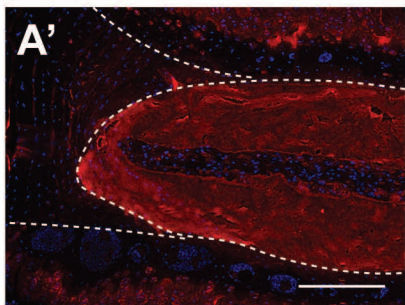

%Area

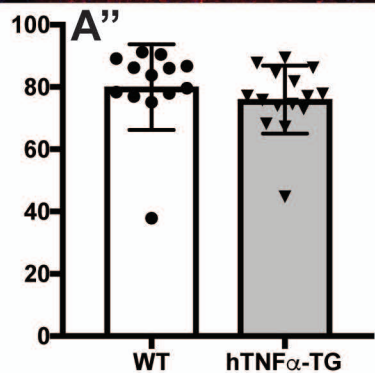

## CS

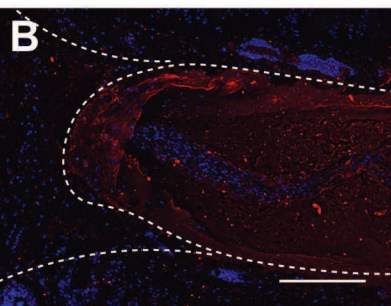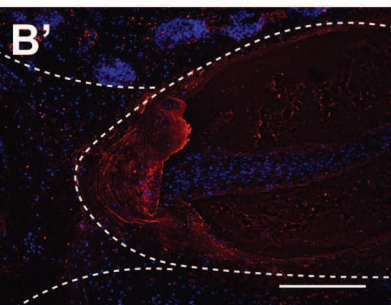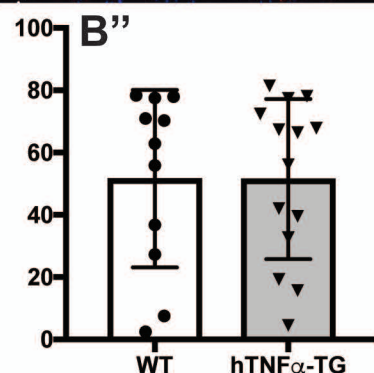

## ARGxx

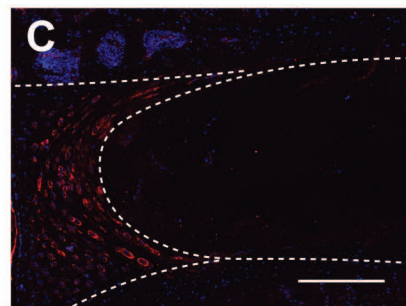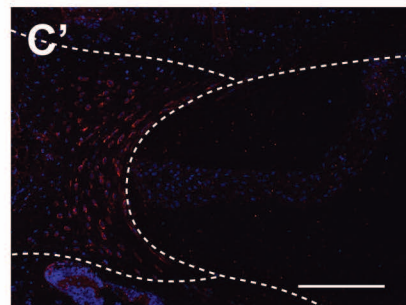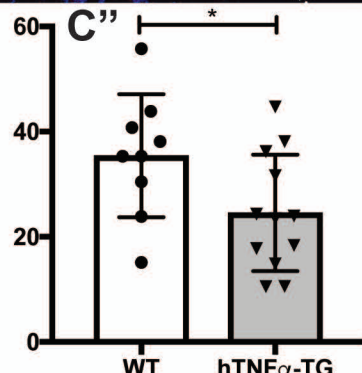

Supplementary Figure 4

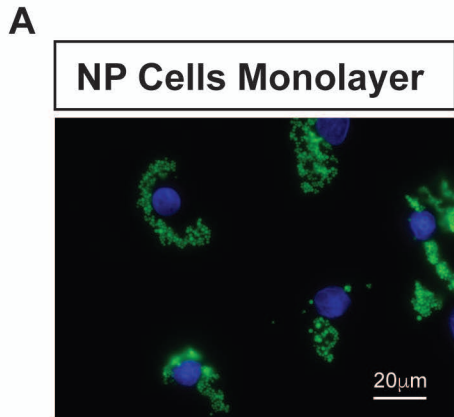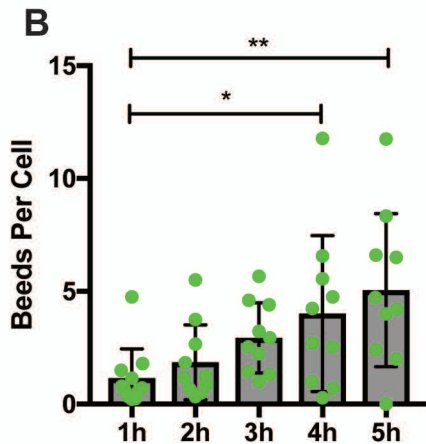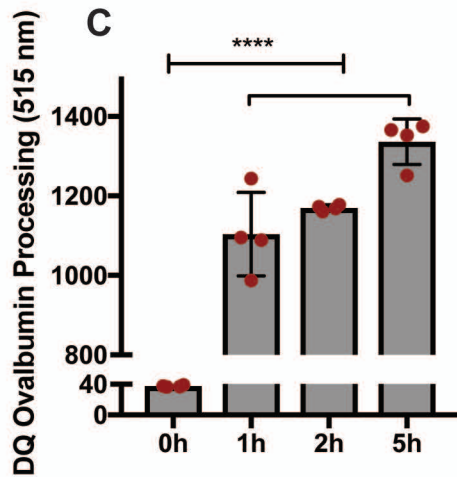

Supplement: NIHMS1065493-supplement-Supp_FigS1-4.pdf [file NIHMS1065493-supplement-Supp_FigS1-4.pdf]
